# Supplementary figures and images for: ST1710–DNA complex crystal structure reveals the DNA binding mechanism of the MarR family of regulators
Source: PubMed Central journal article supplement — Nucleic Acids Res. 2009 Jun 9;37(14):4723–35. doi: 10.1093/nar/gkp496 (PMC2724296; doi:10.1093/nar/gkp496), 2009-06-09

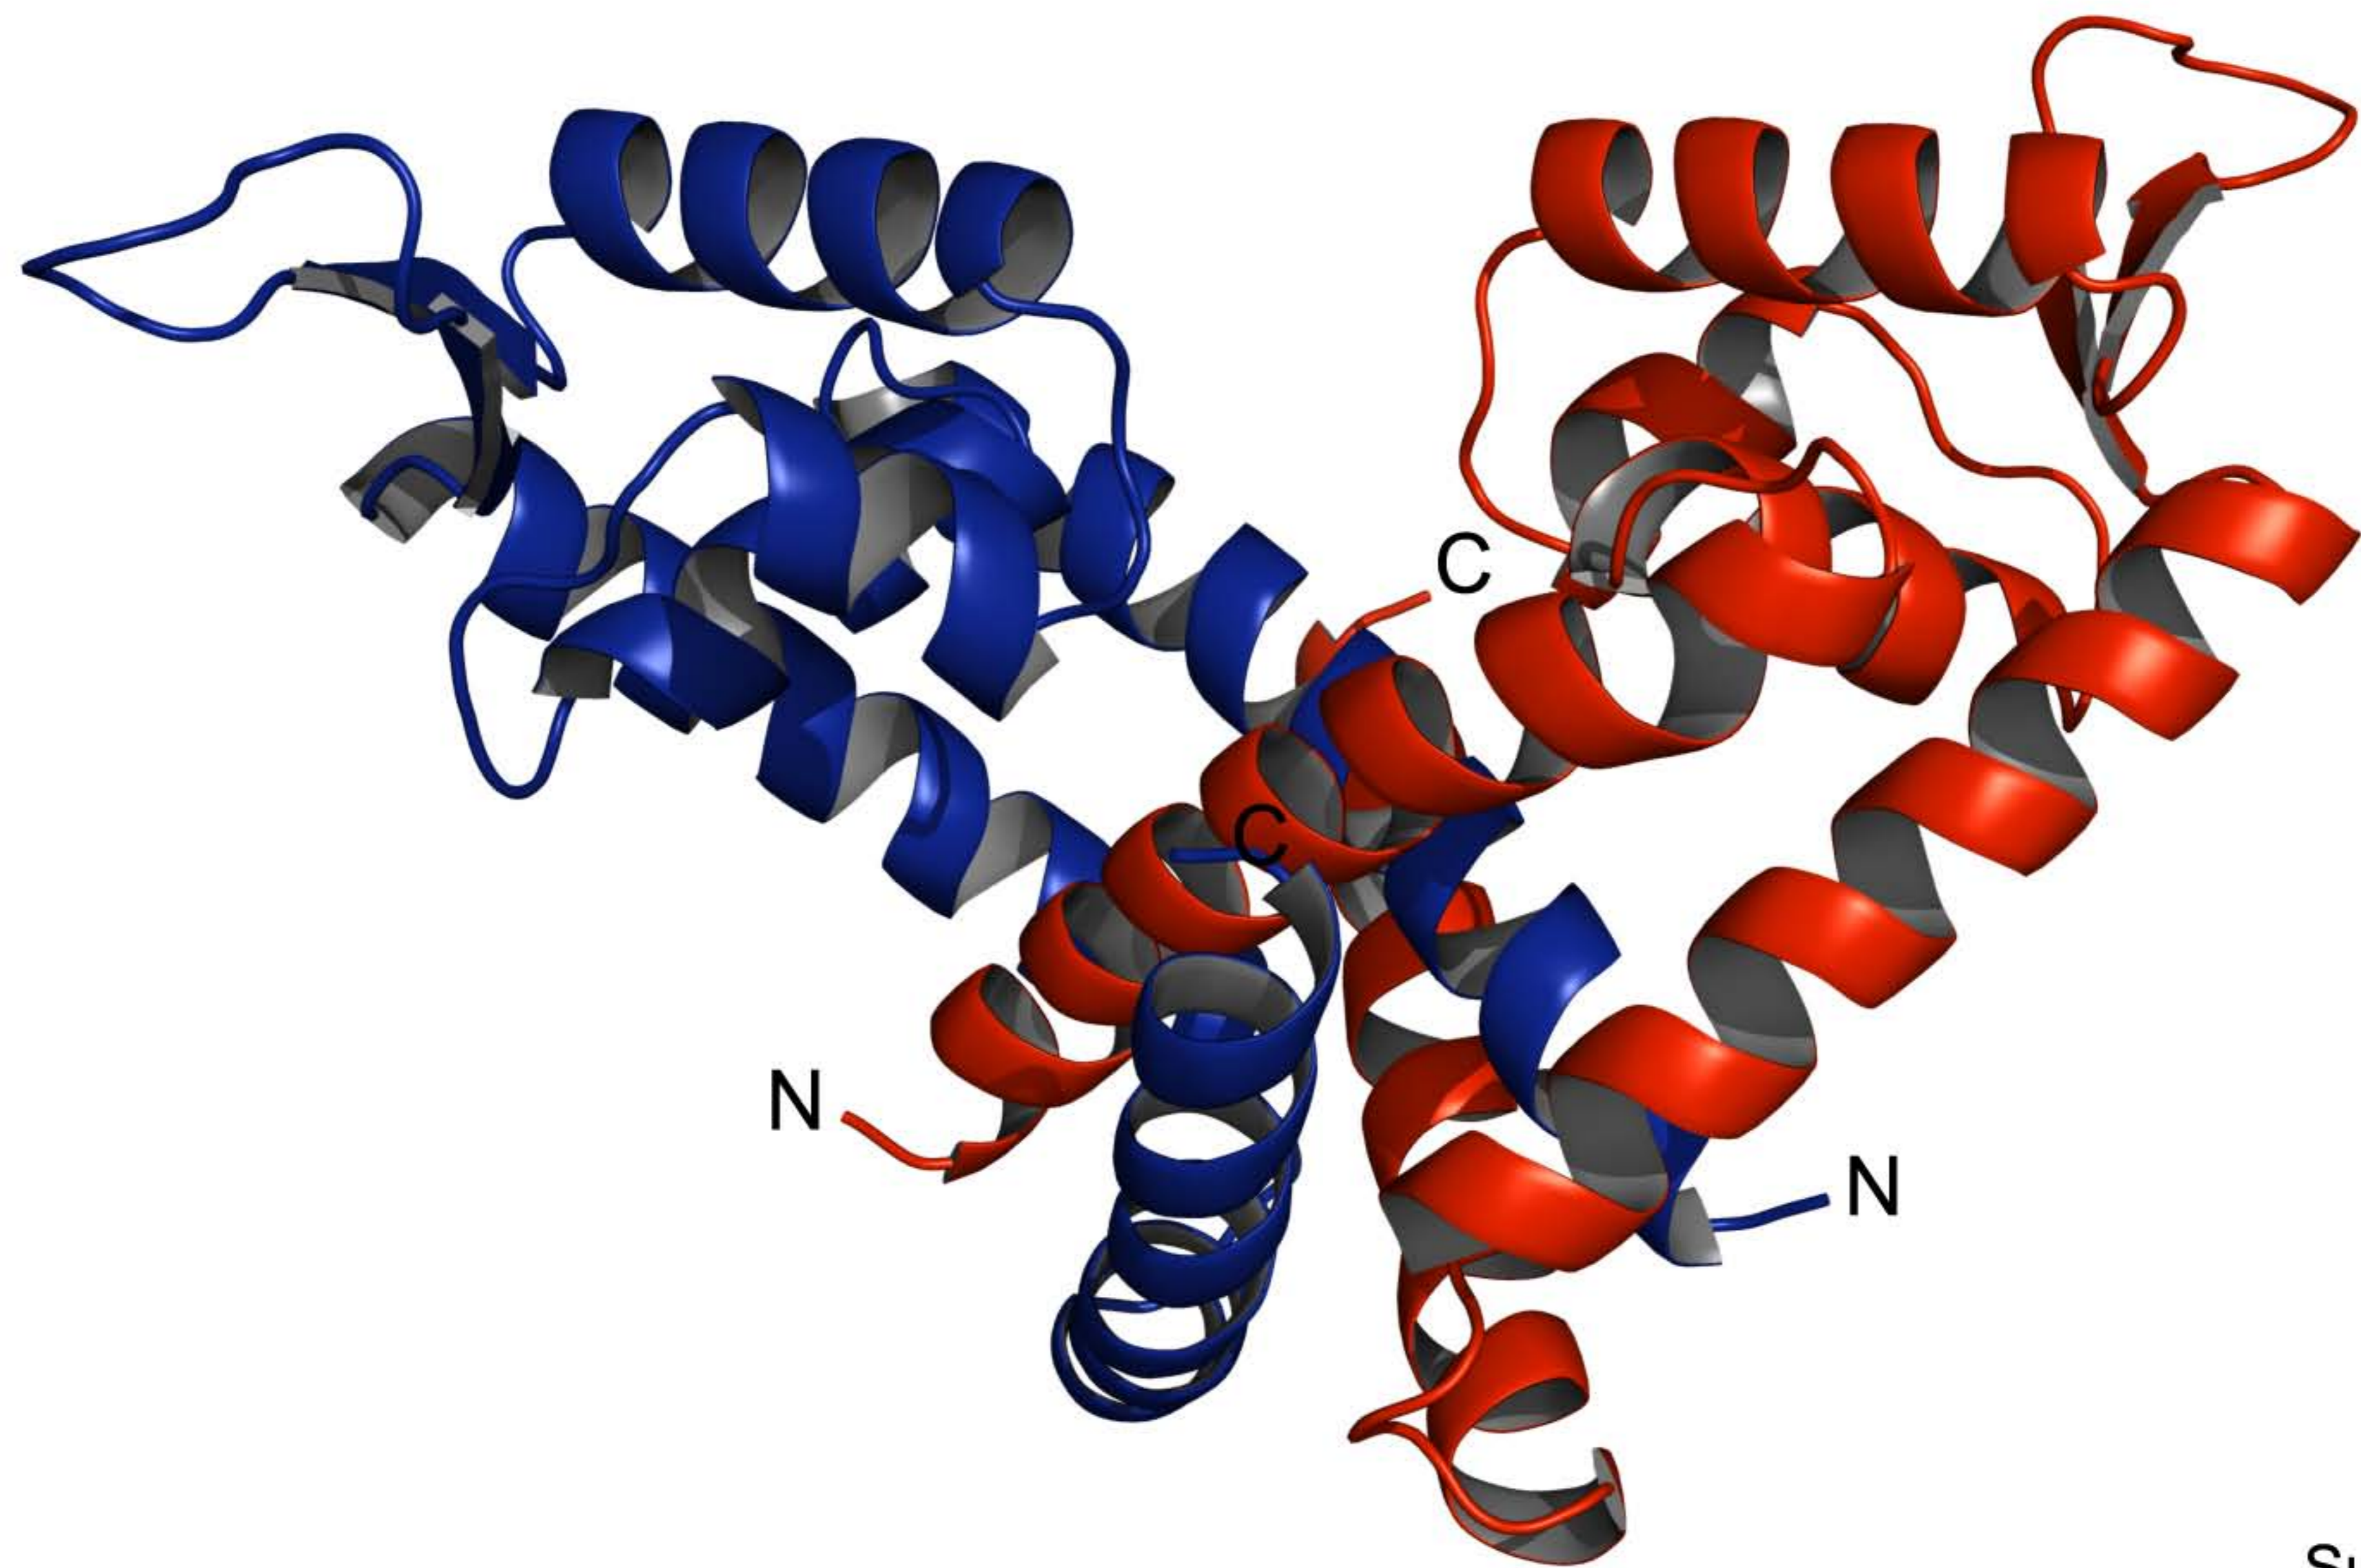

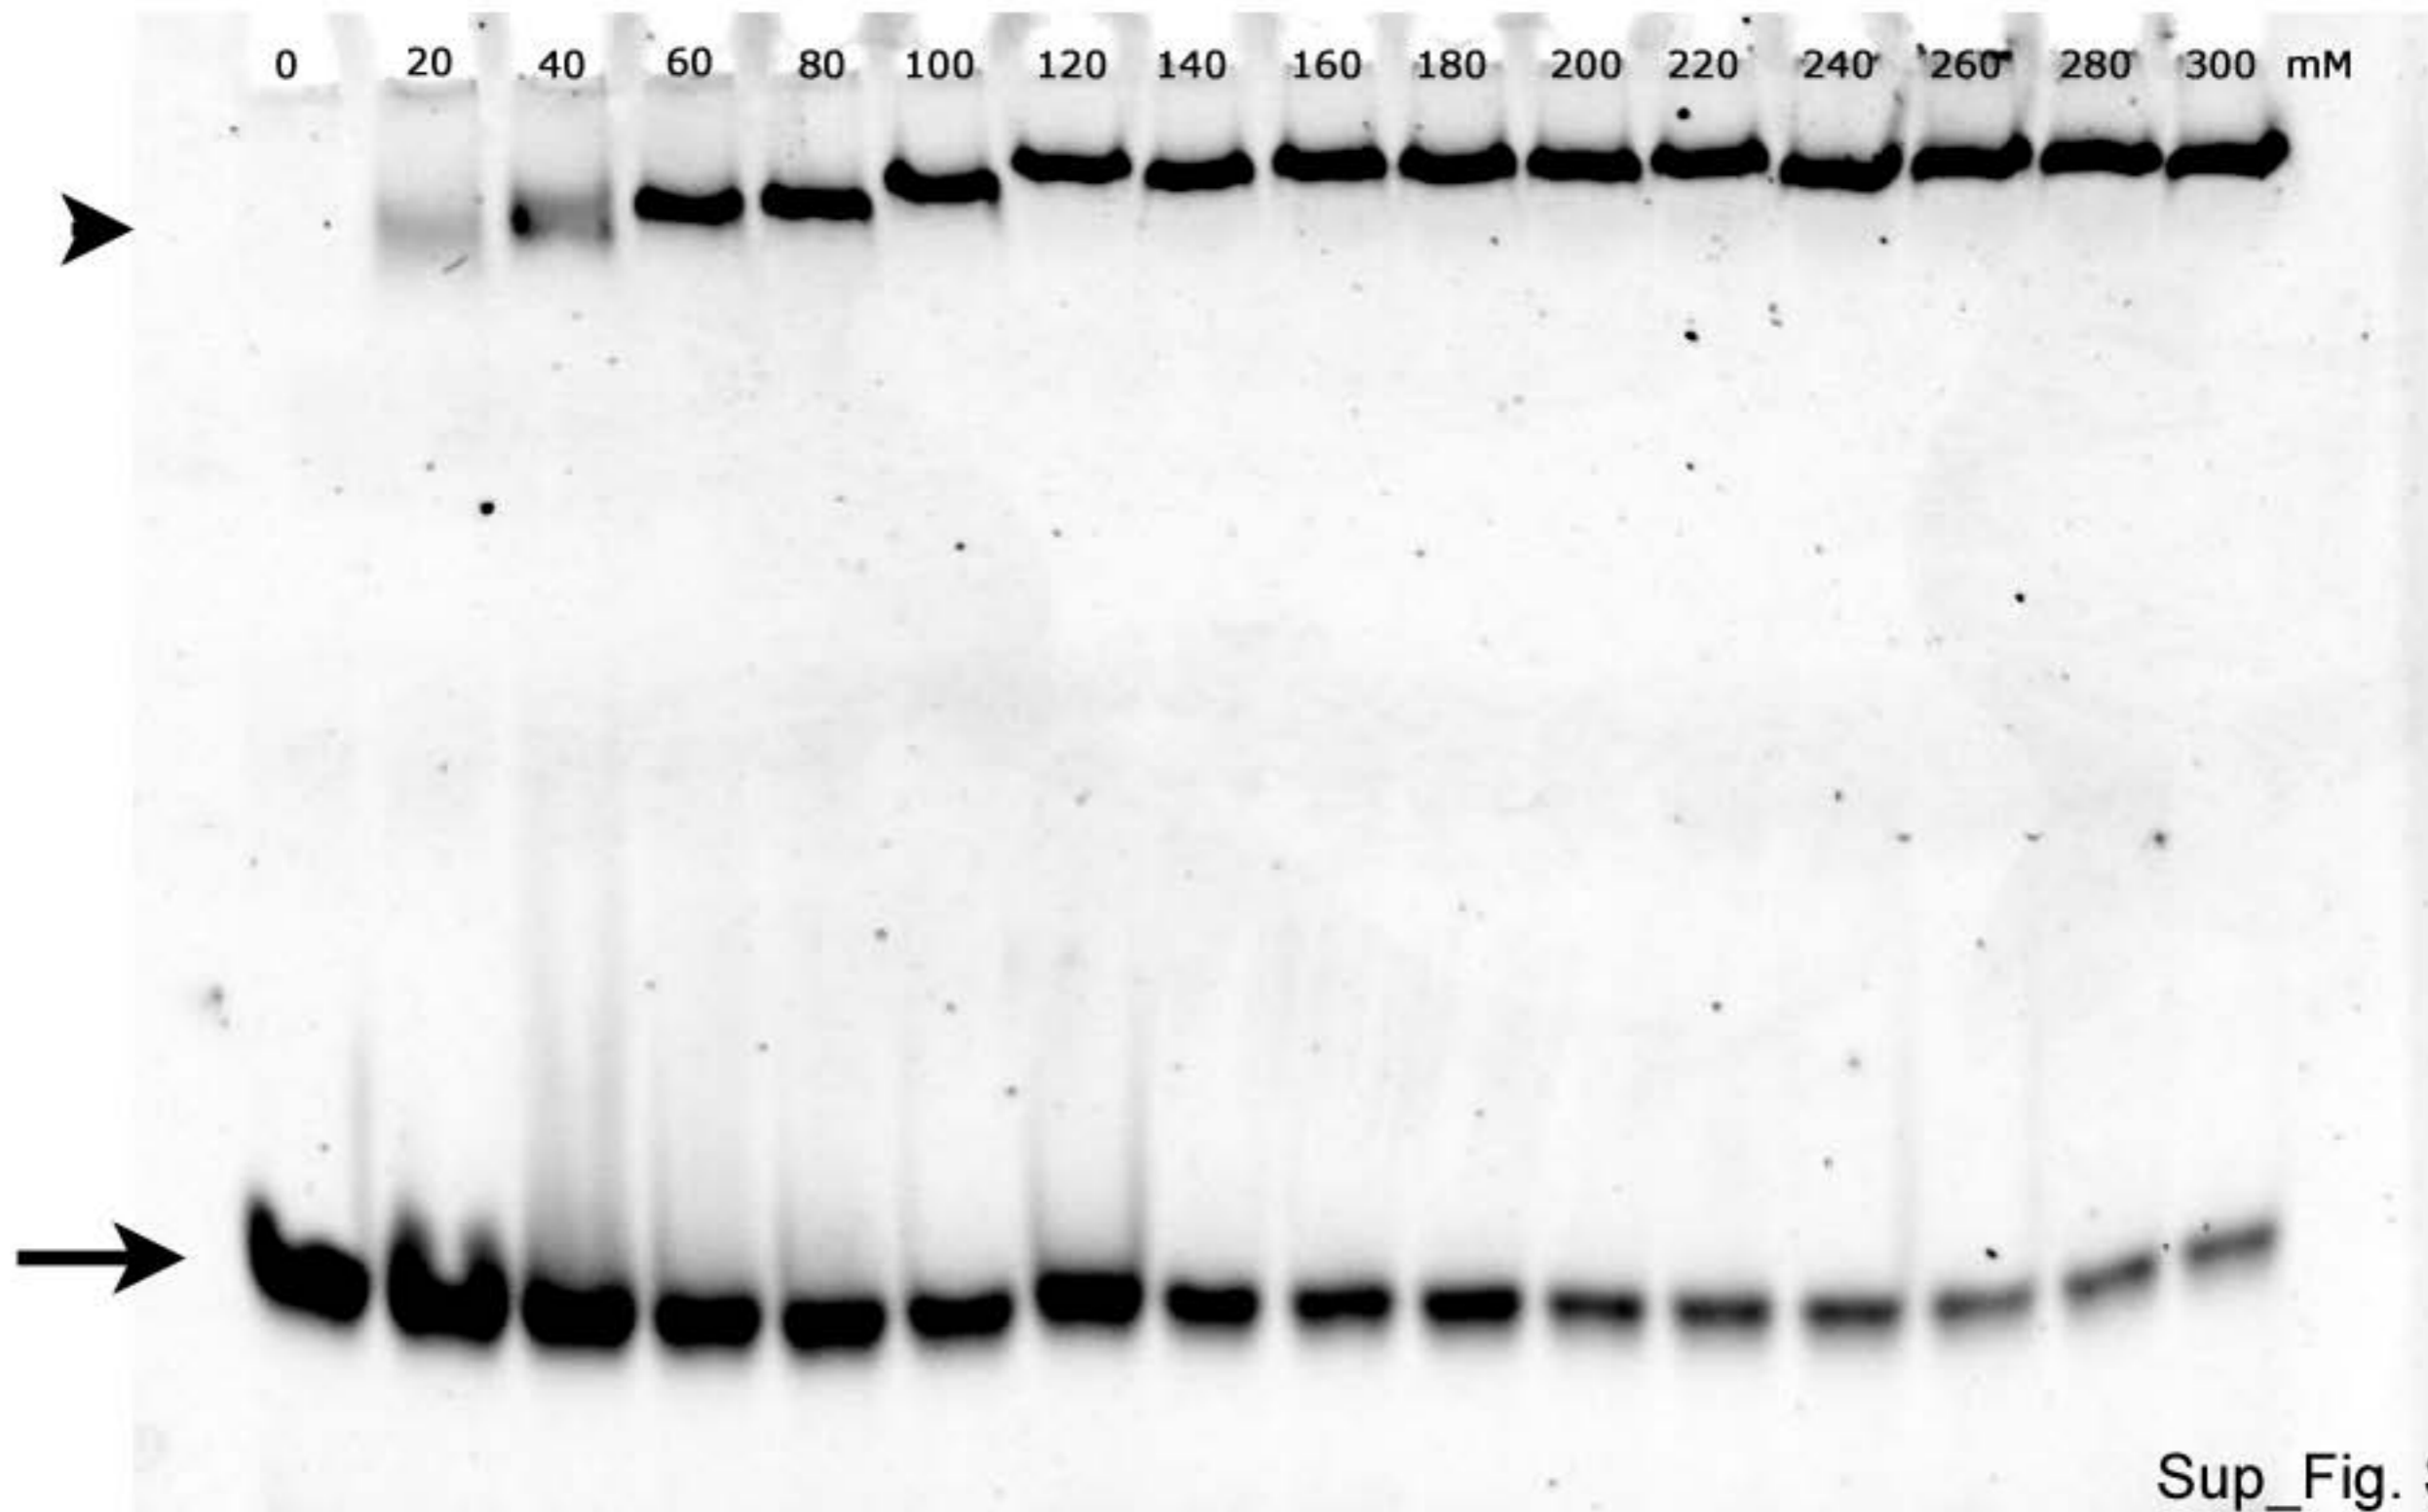

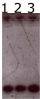

Sub\_Fig. S3

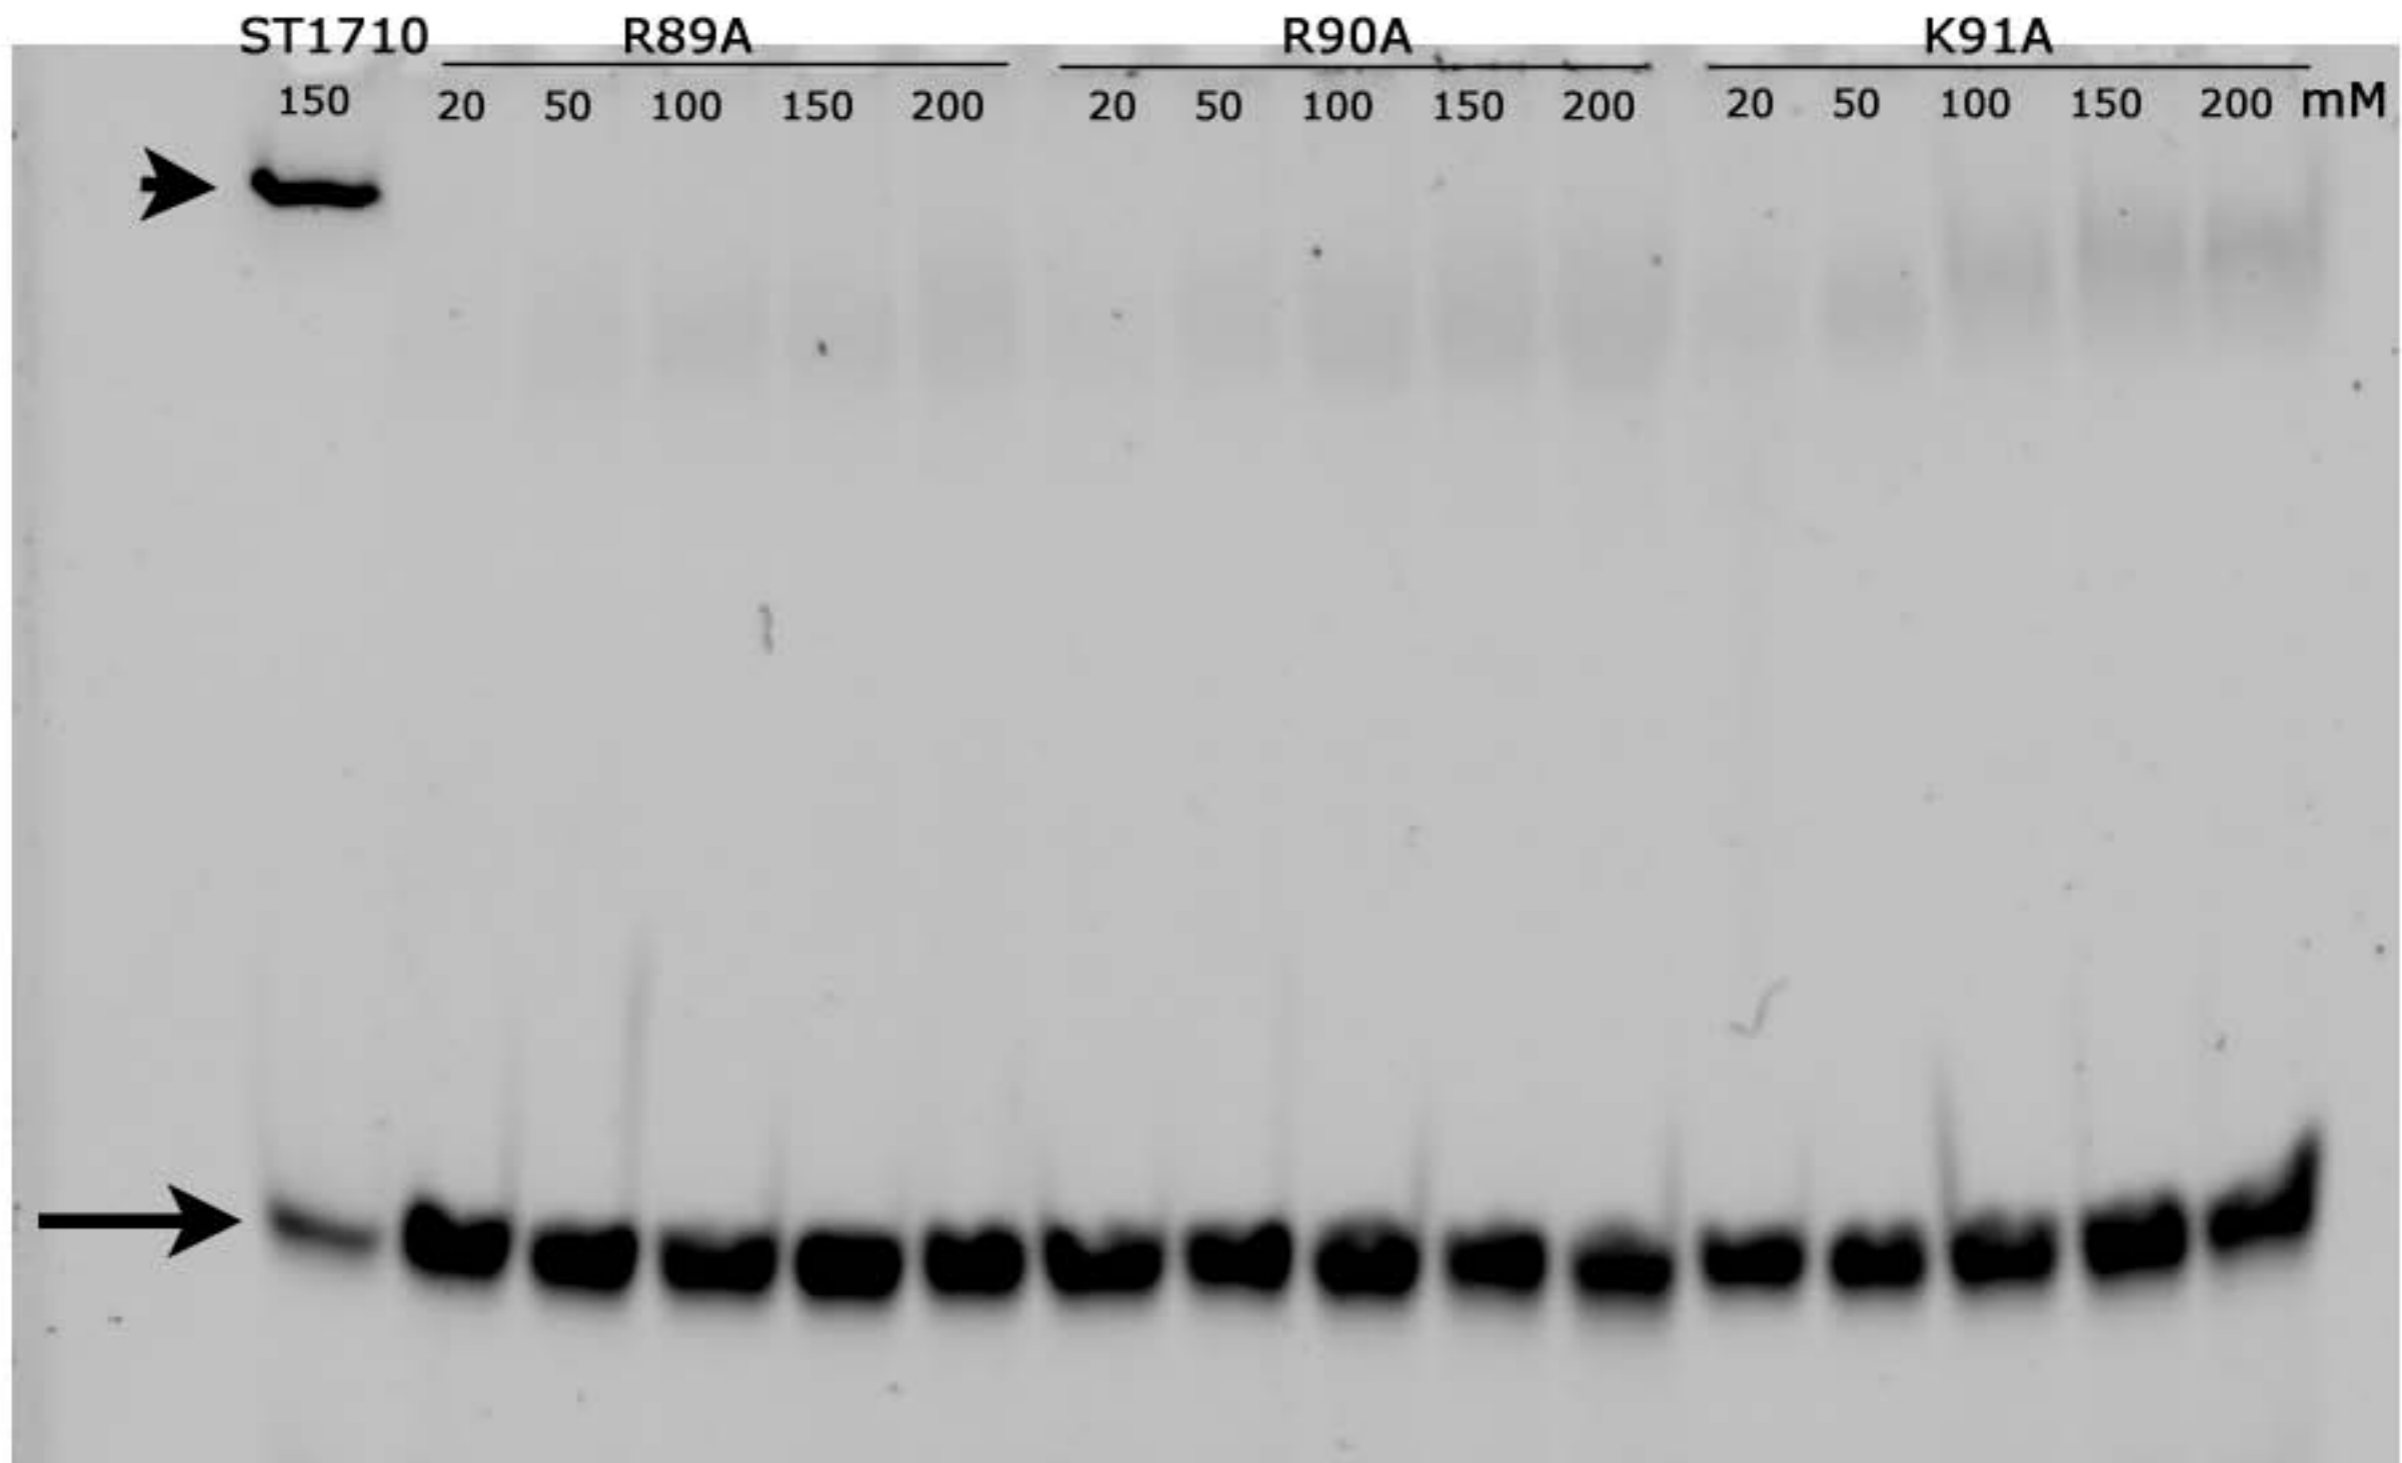



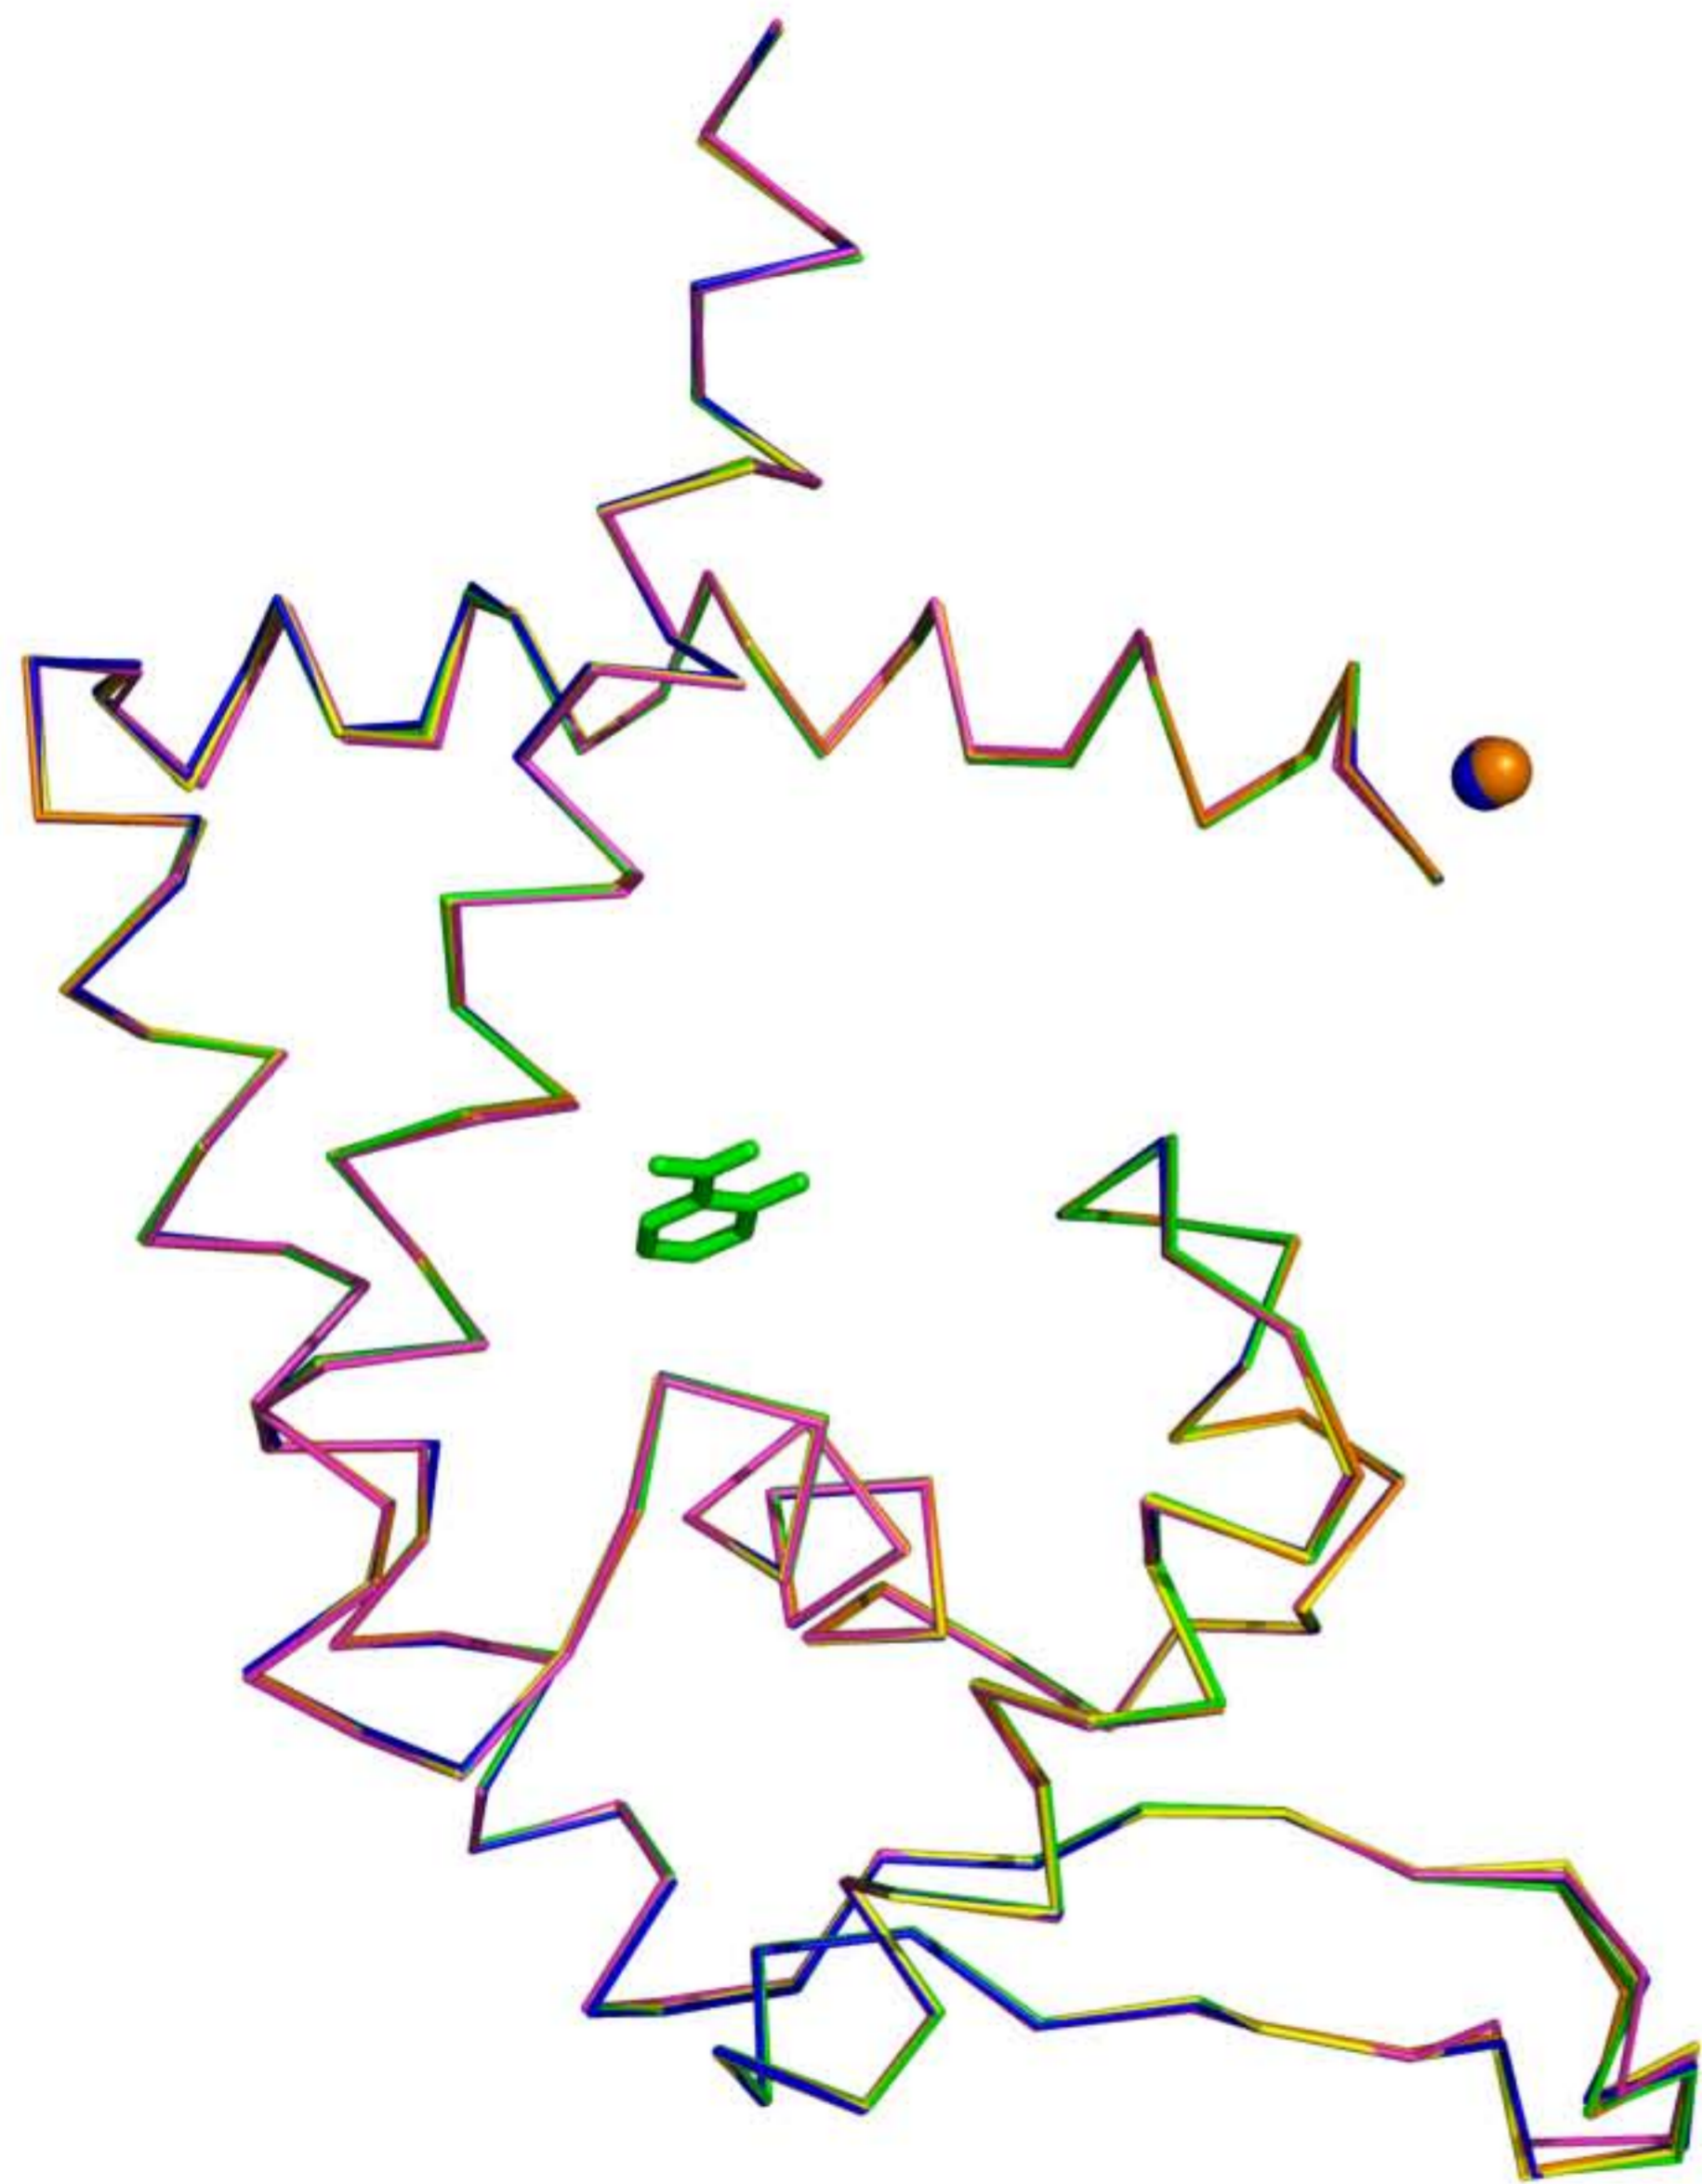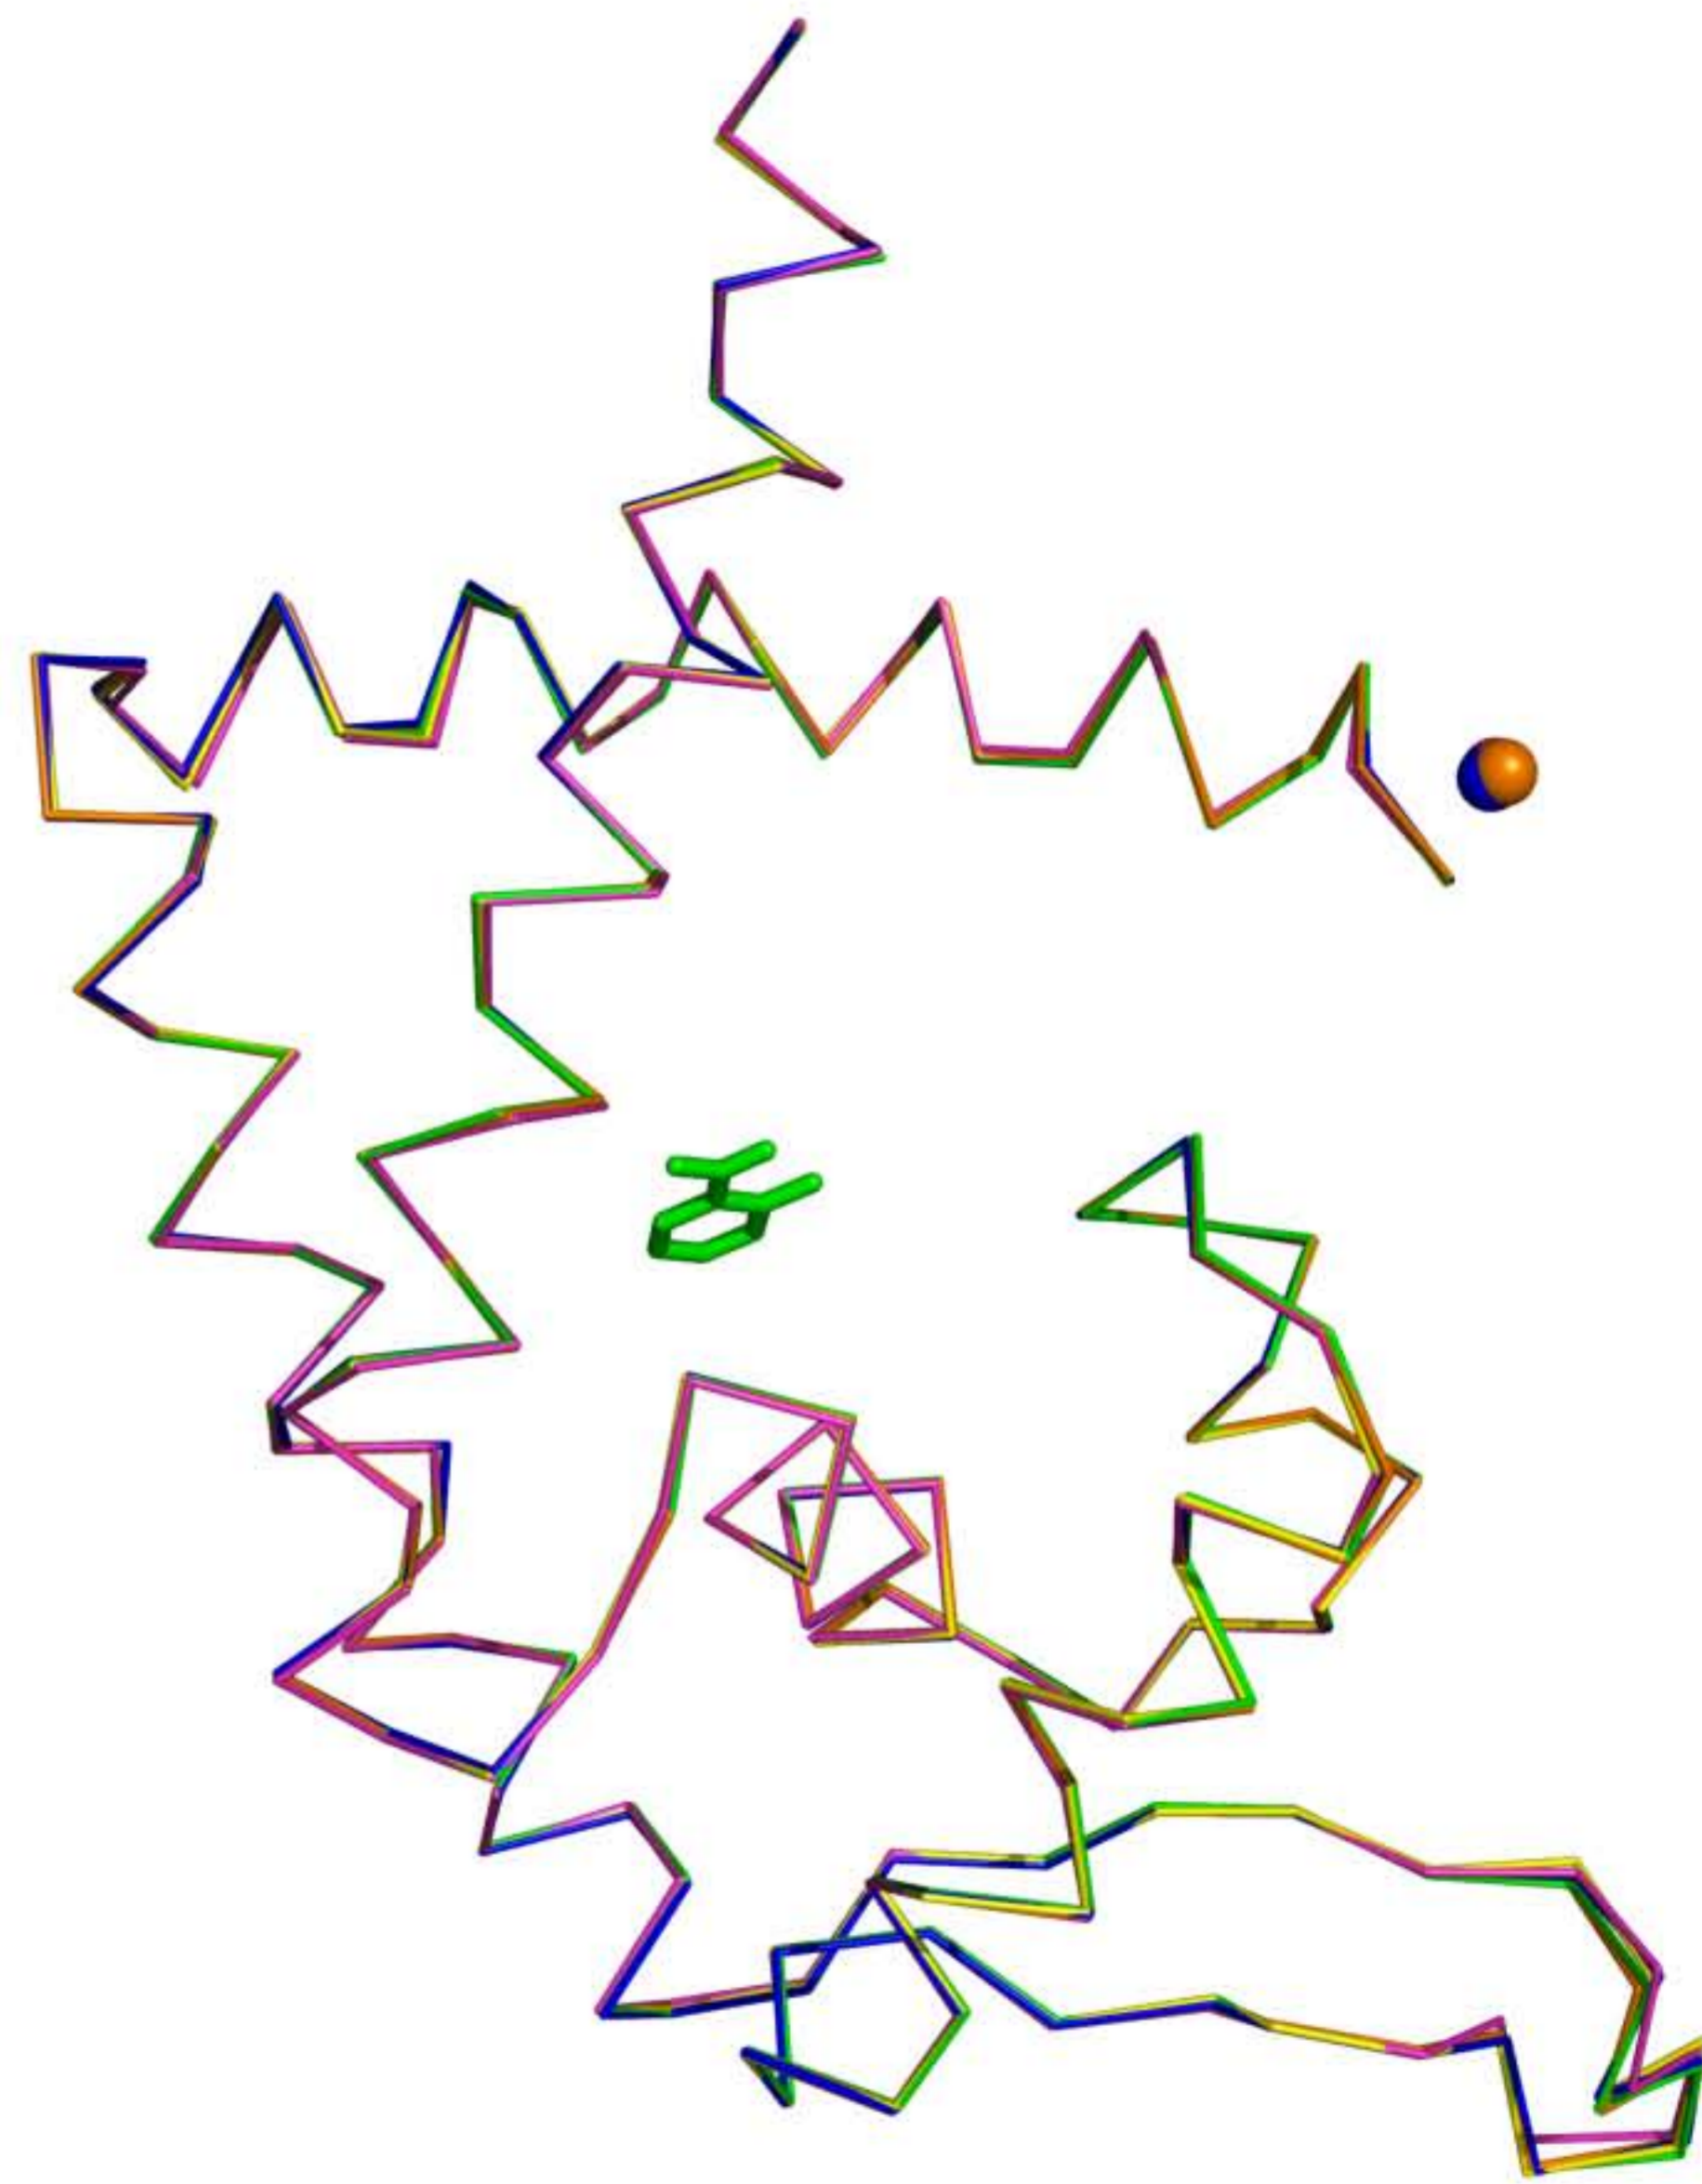

ST1710 (apo-form)-Orange; ST1710-Salicylate -Green; R89A-Magenta; R90A-Blue; K91A-Yellow

Sup\_Fig. S5



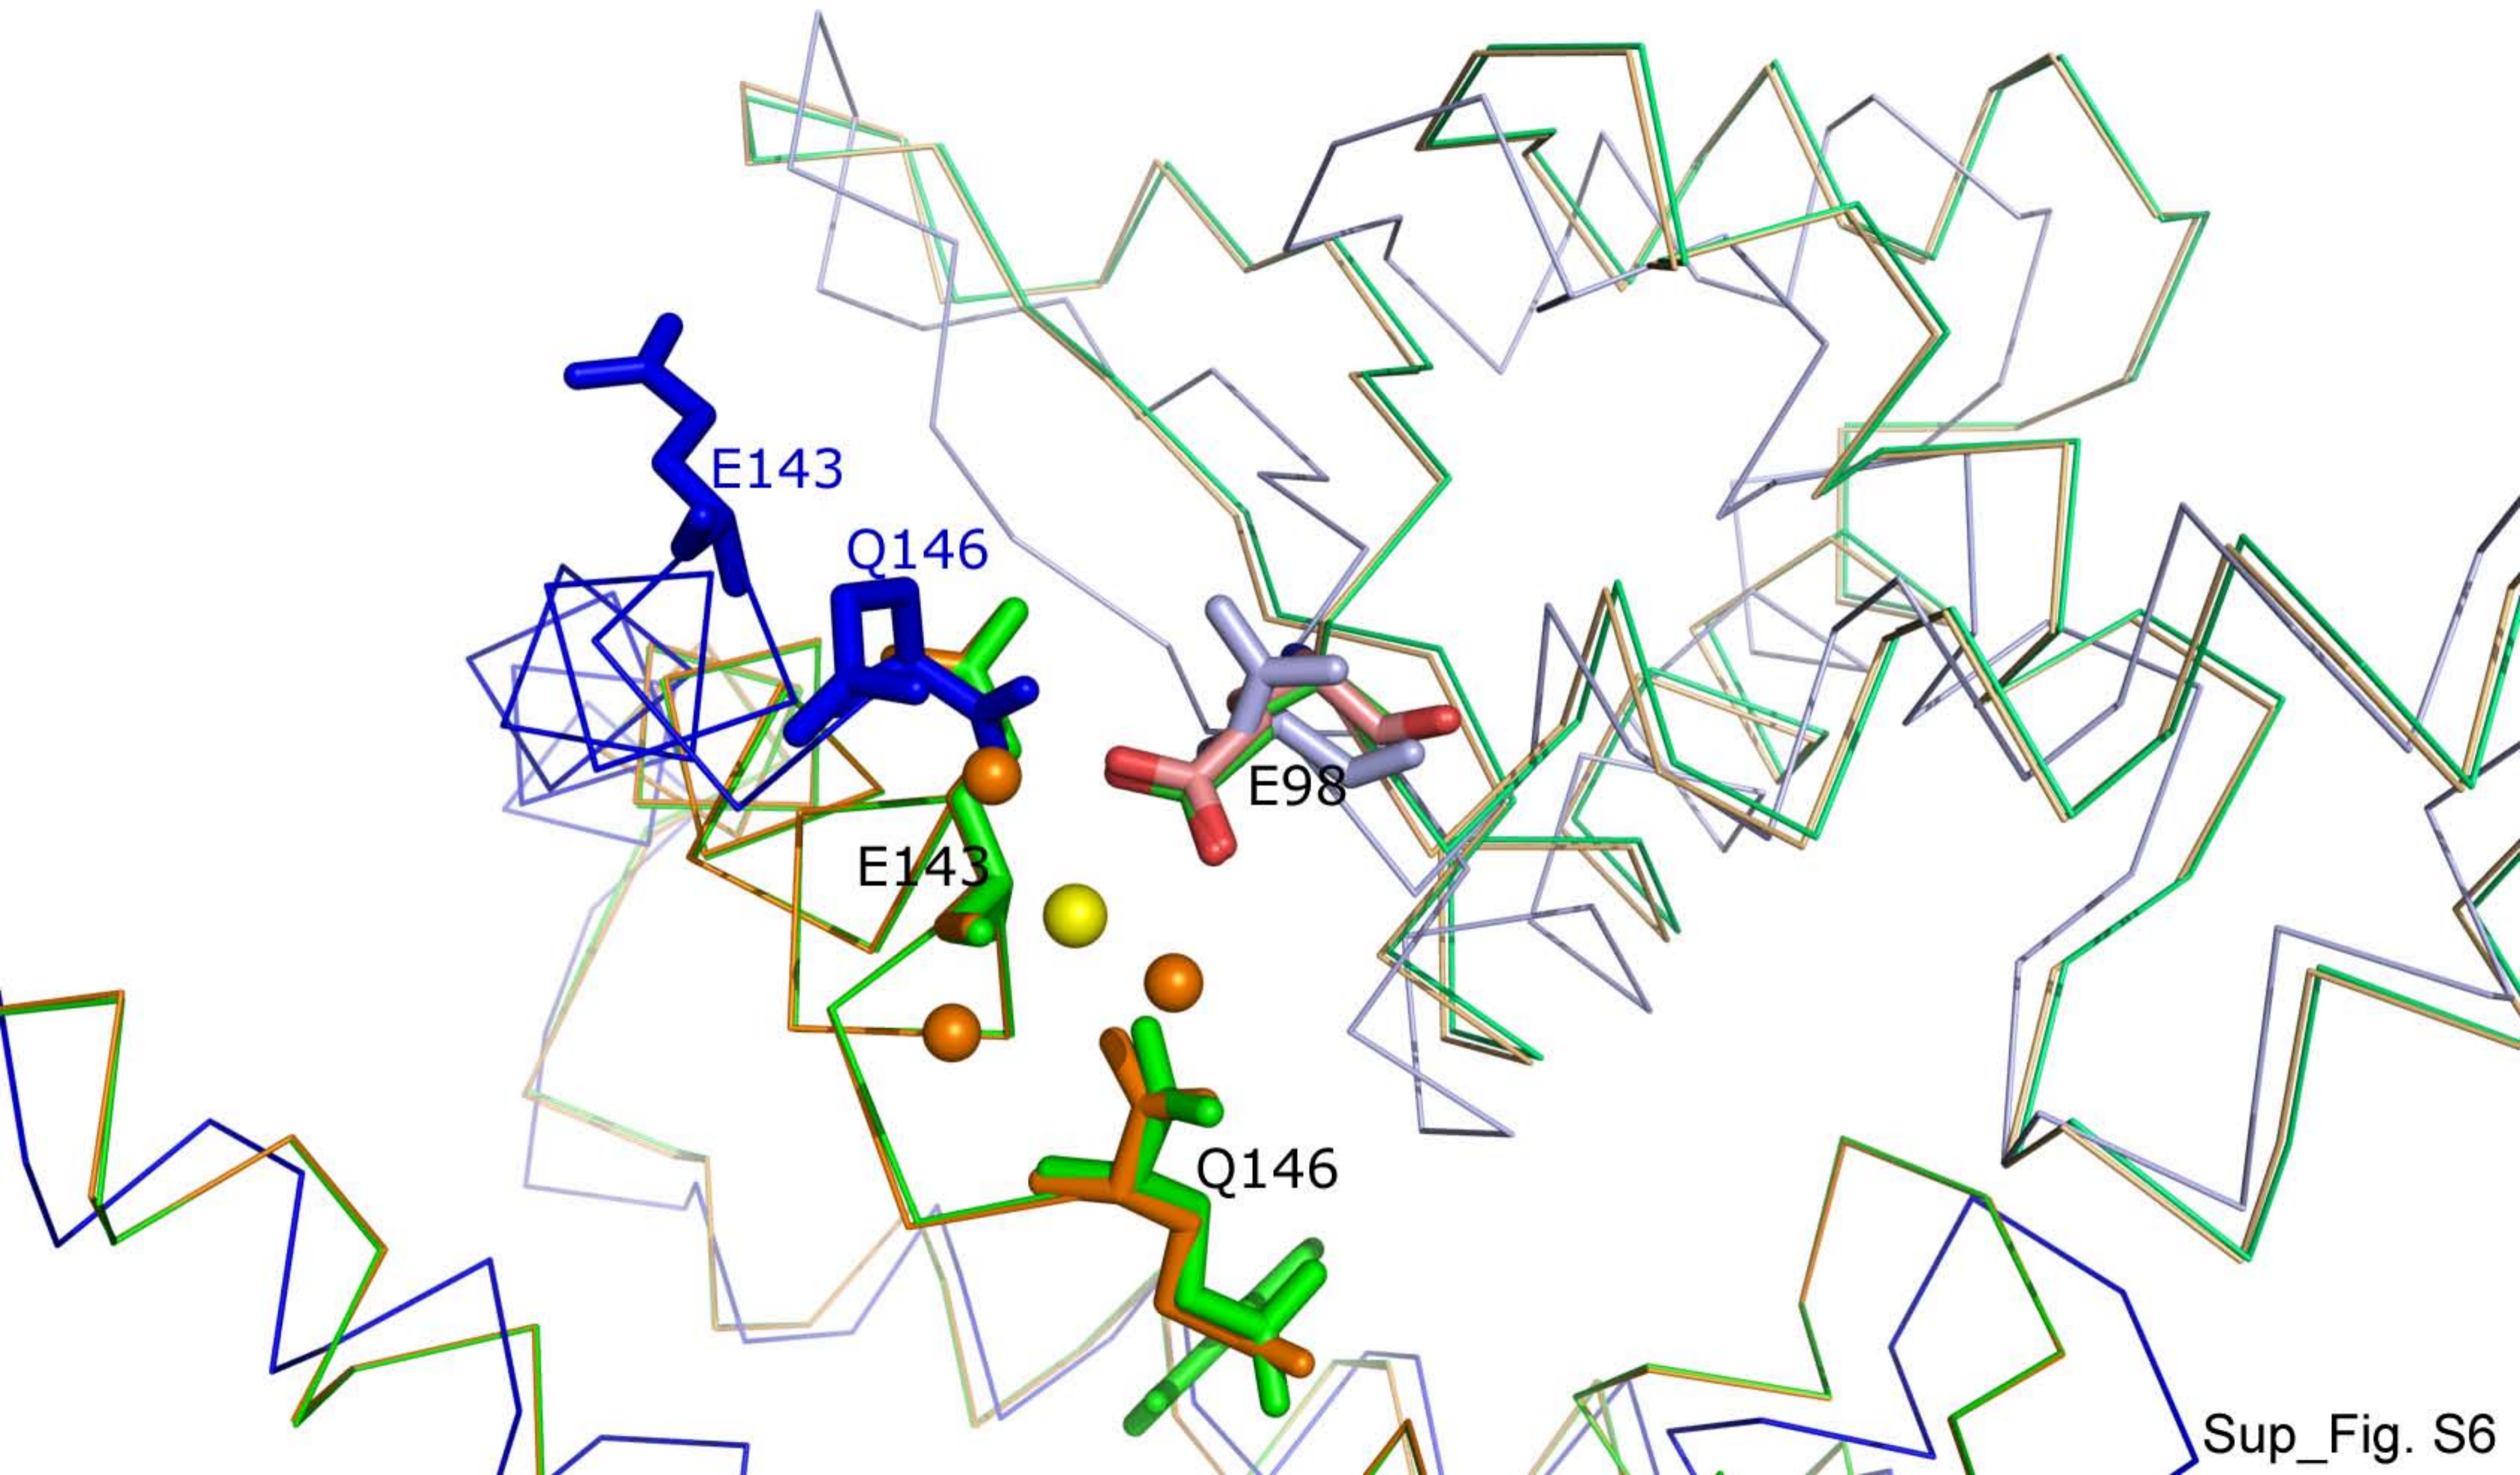



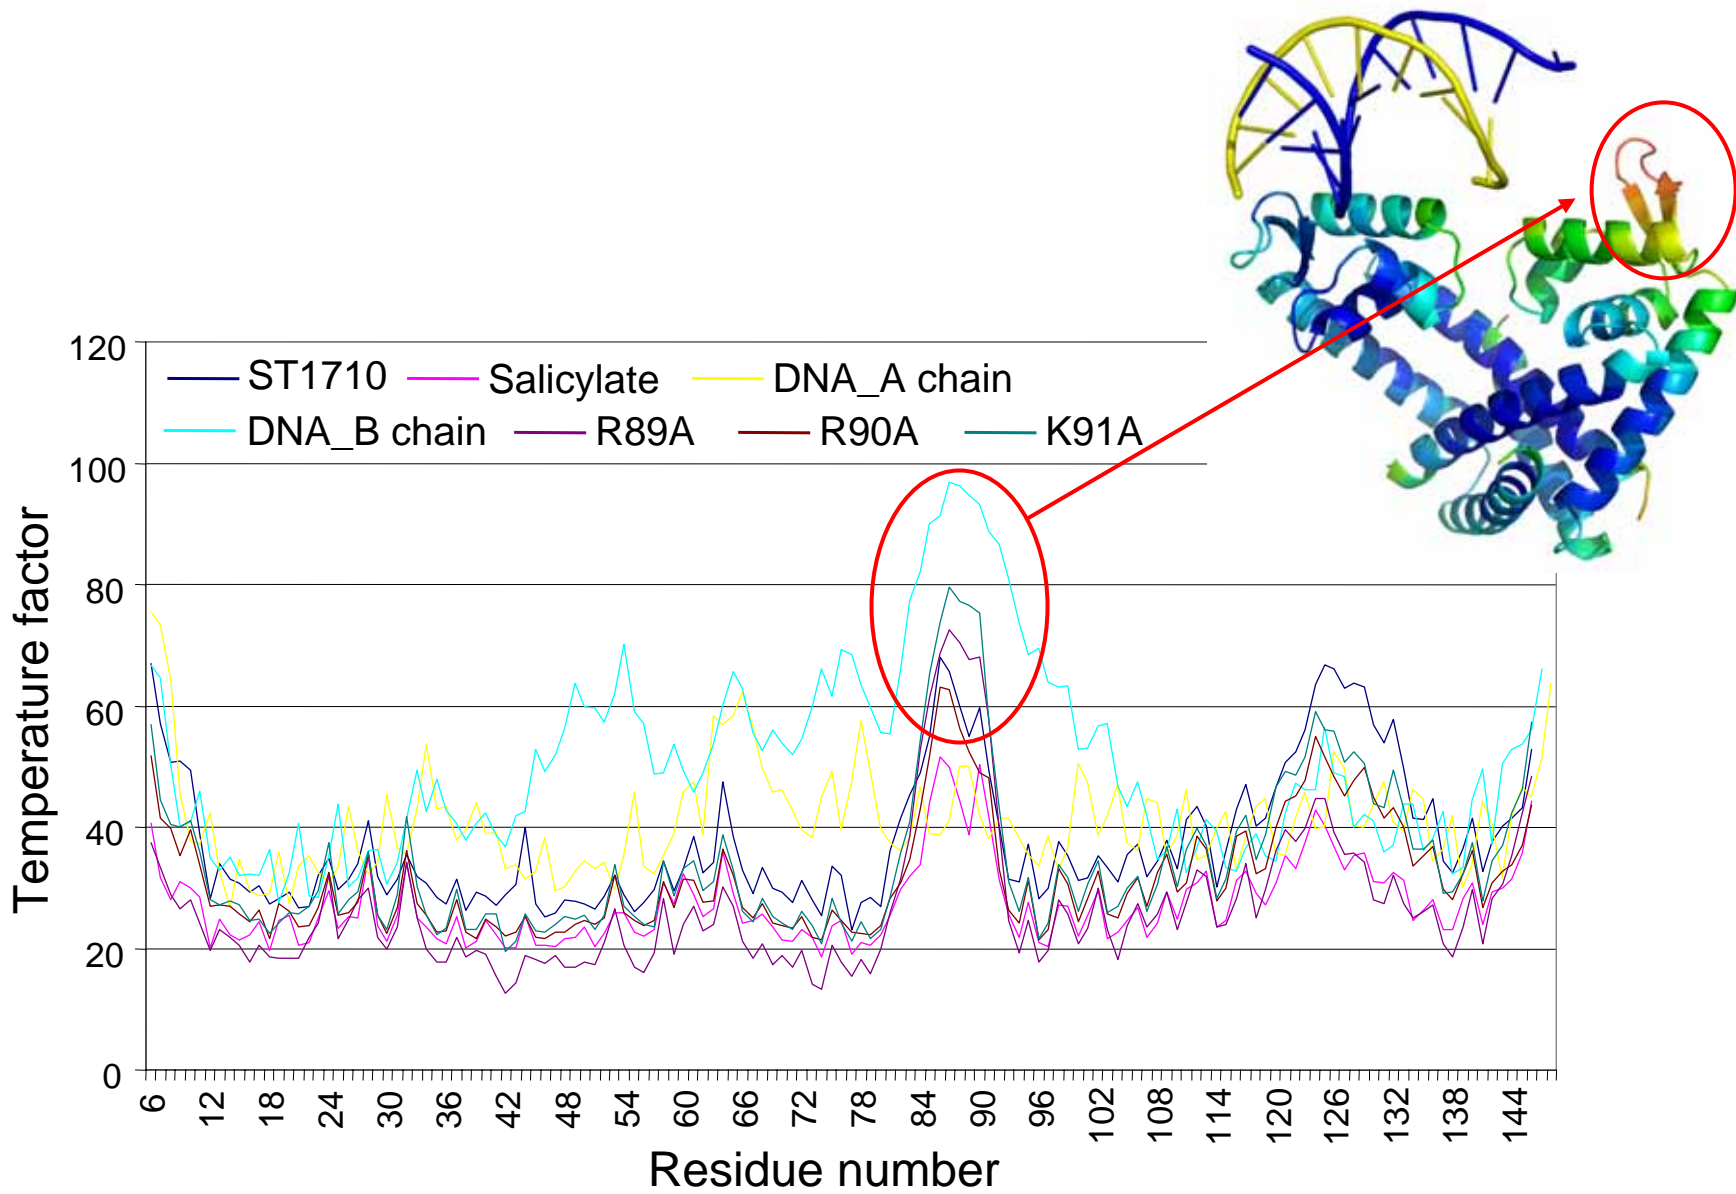

Supplement: gkp496_1.pdf [file gkp496_1.pdf]
